# Supplementary material for: Multi-omics integration and regulatory inference for unpaired single-cell data with a graph-linked unified embedding framework
Source: bioRxiv or medRxiv preprint supplement (doi:10.1101/2021.08.22.457275), 2021-09-06
Supplement: Supplementary file [file media-1.pdf]

# Supplementary Information

**Multi-omics integration and regulatory inference for unpaired single-cell data with a graph-linked unified embedding framework**

**Cao et al.**

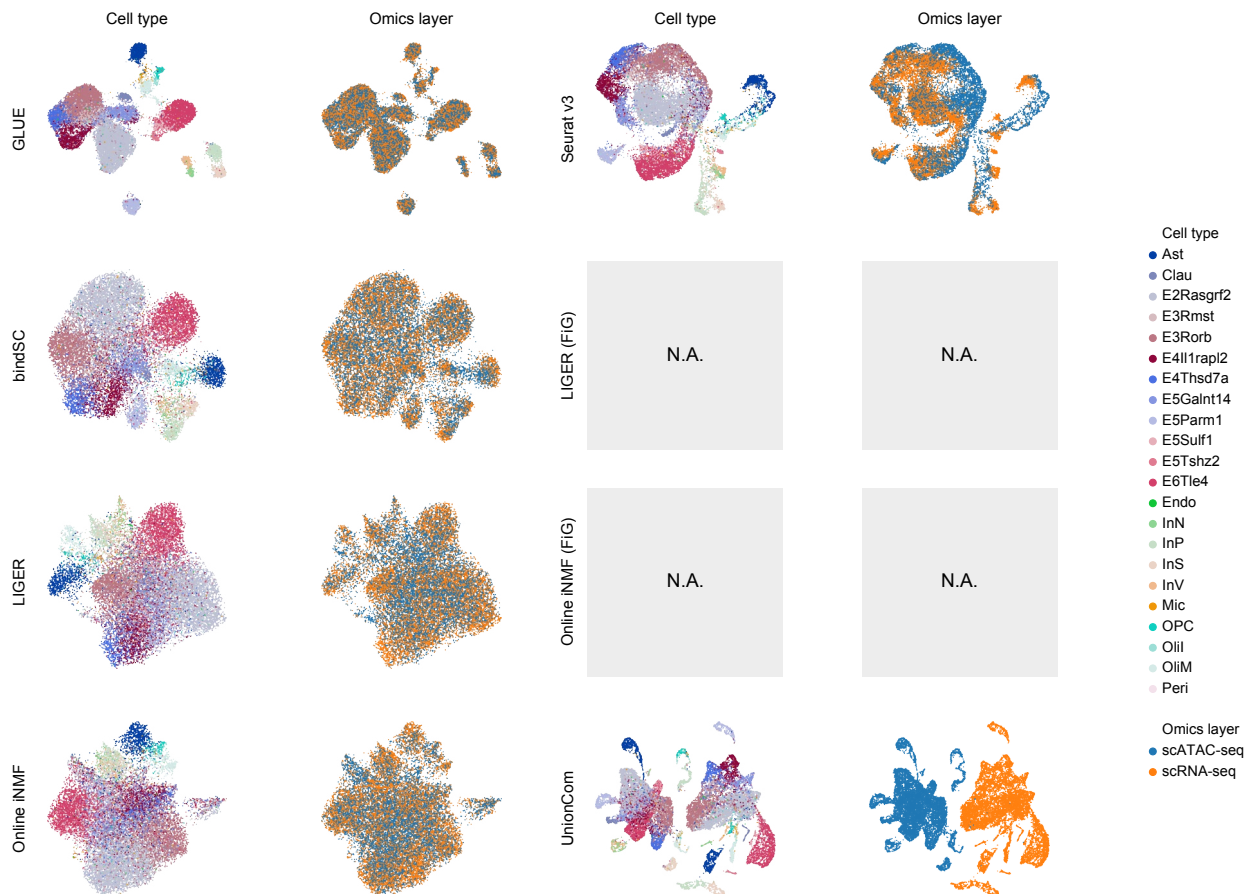

**Supplementary Fig. 1 UMAP visualizations of the cell embeddings in the SNARE-seq dataset aligned with different integration methods.**

Online iNMF and LIGER could not run with FiG conversion because raw ATAC fragment file was not available.

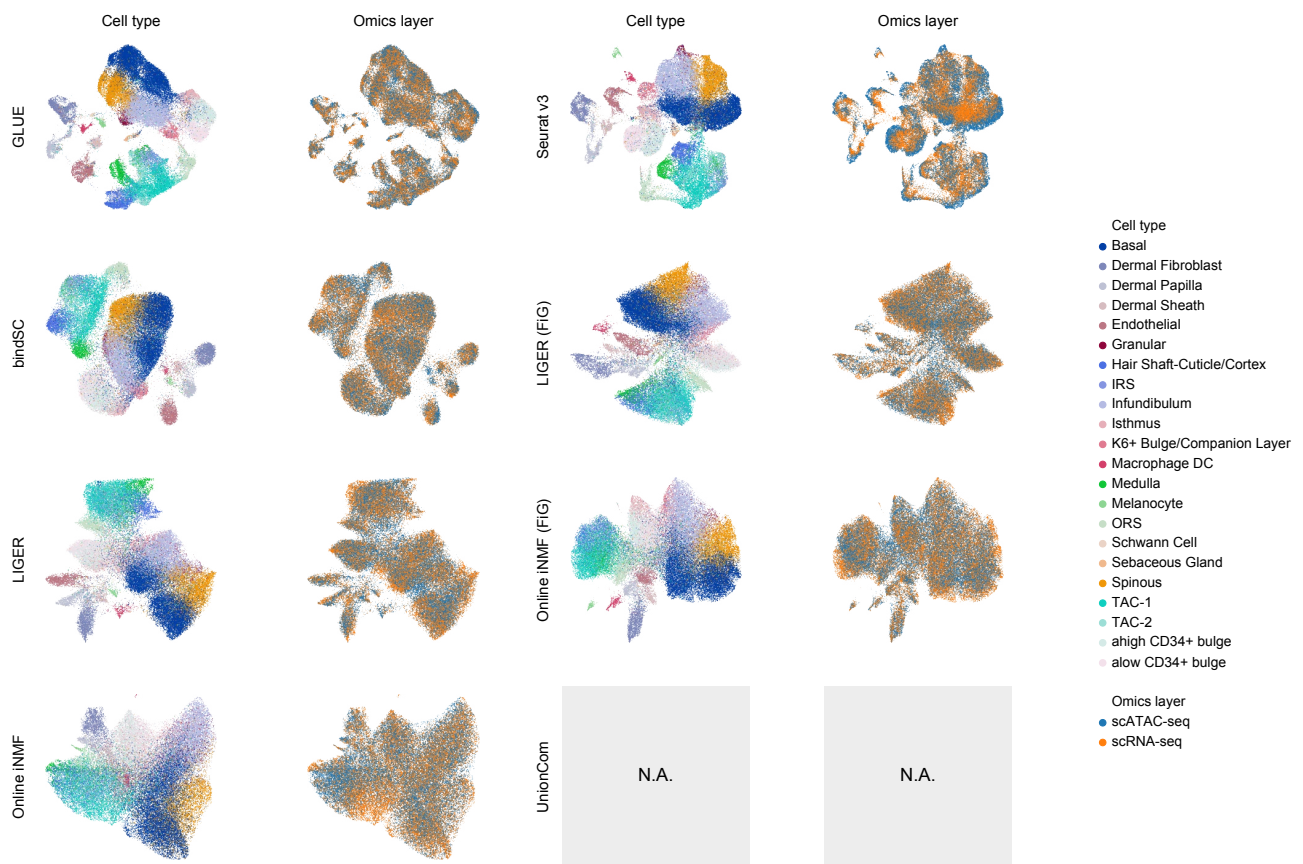

**Supplementary Fig. 2 UMAP visualizations of the cell embeddings in the SHARE-seq dataset aligned with different integration methods.**

UnionCom failed to run because of memory overflow.

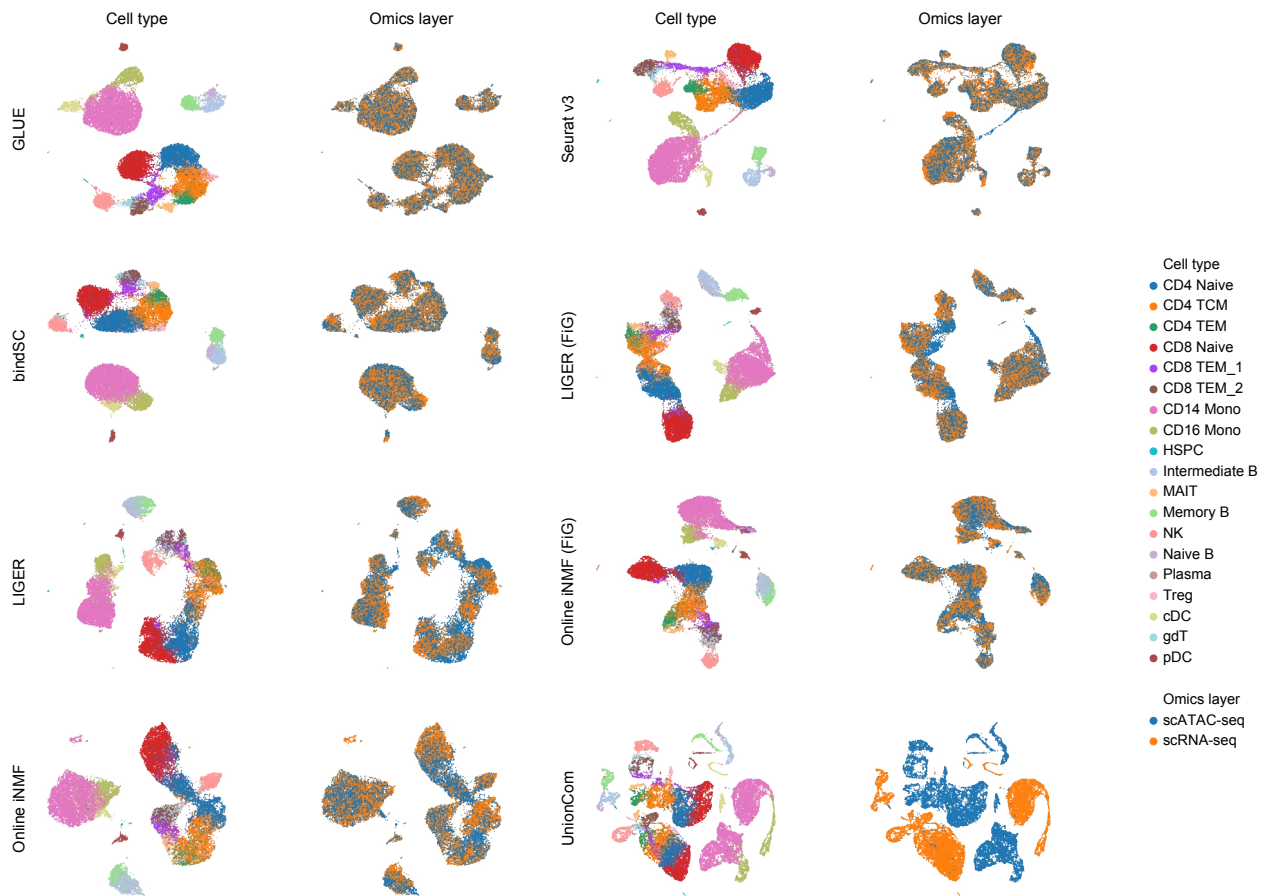

**Supplementary Fig. 3 UMAP visualizations of the cell embeddings in the 10x Multiome dataset aligned with different integration methods.**



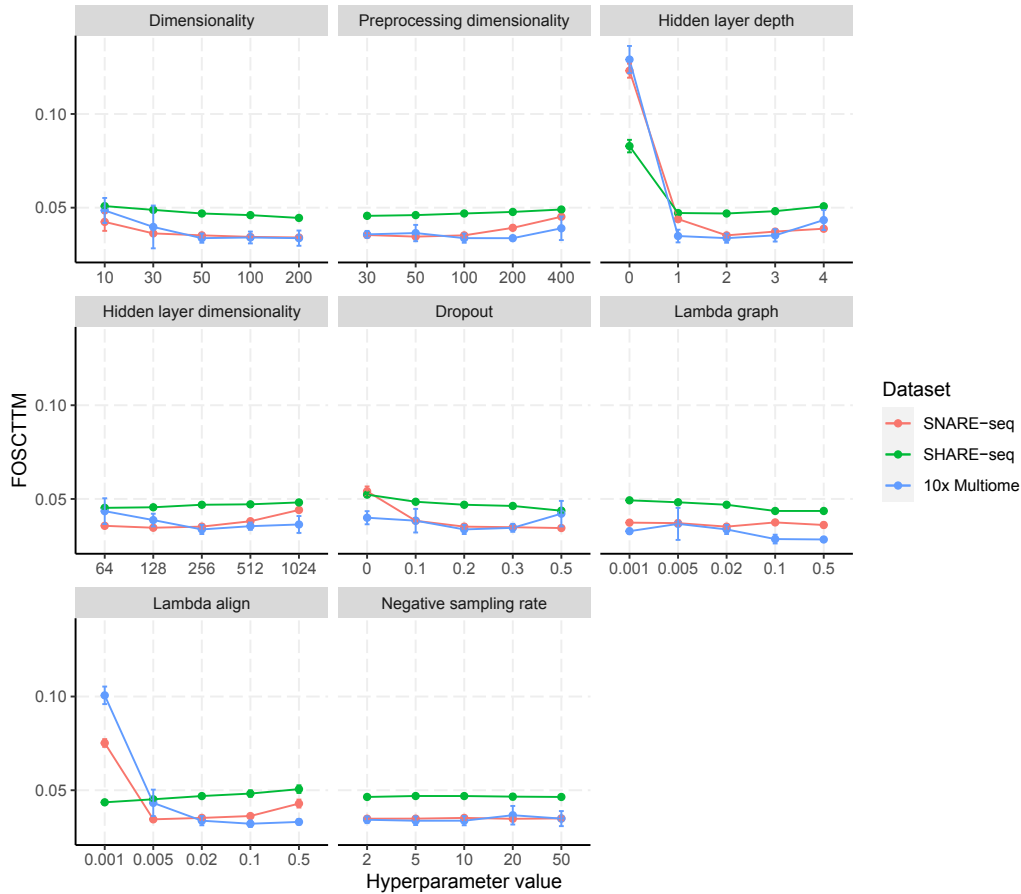

**Supplementary Fig. 4 FOSCTTM of GLUE under different hyperparameter settings.**

“Dimensionality” denotes the cell embedding dimensionality. “Preprocessing dimensionality” is the reduced dimensionality used for the first transformation layers of the data encoders (see Methods). “Hidden layer depth” is the number of hidden layers in the data encoders and modality discriminator. “Hidden layer dimensionality” is the dimensionality of hidden layers in the data encoders and modality discriminator. “Dropout” is the dropout rate of hidden layers in data encoders and modality discriminator. “Lambda graph” is the weight of the graph loss ( $\lambda_G$ ). “Lambda align” is the weight of the adversarial alignment ( $\lambda_D$ ). “Negative sampling rate” is the number of empirical samples used in negative edge sampling (samples from  $p_{ns}$ ). For each hyperparameter, the center value is the default. To control computational cost, one hyperparameter was varied at a time, with all others set to their default values. The performance of GLUE was robust across a wide range of hyperparameter settings, except for failed alignments in which the adversarial alignment weight was too low or no hidden layers were used in the neural networks (equivalently a linear model with insufficient capacity).

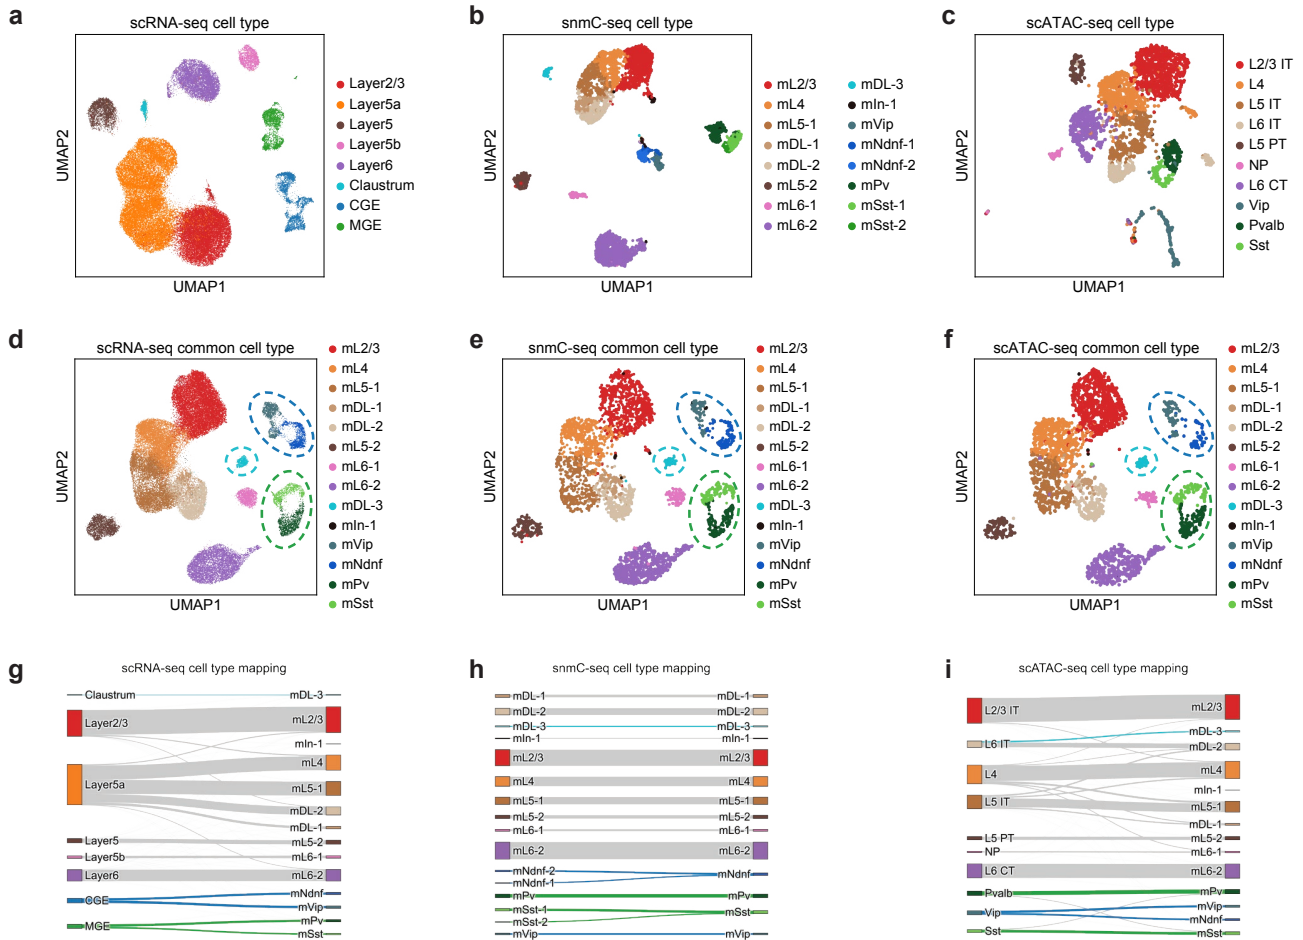

### Supplementary Fig. 5 Triple-omics alignment and label transfer.

**a-c**, UMAP visualizations of the cell embeddings before integration for **a**, scRNA-seq, **b**, snmC-seq, and **c**, scATAC-seq, colored by the original cell types. **d-f**, UMAP visualizations of the integrated cell embeddings for **d**, scRNA-seq, **e**, snmC-seq, and **f**, scATAC-seq, colored by the unified cell types (labels transferred from snmC-seq). **g-i**, Alluvial diagrams comparing the original cell types and unified cell types for **g**, scRNA-seq, **h**, snmC-seq, and **i**, scATAC-seq. The original cell types are to the left, and the unified cell types are to the right. Cells relabeled to “mPv” and “mSst” are highlighted with green flows. Cells relabeled to “mNdnf” and “mVip” are highlighted with dark blue flows. Cells relabeled to “mDL-3” are highlighted with light blue flows.

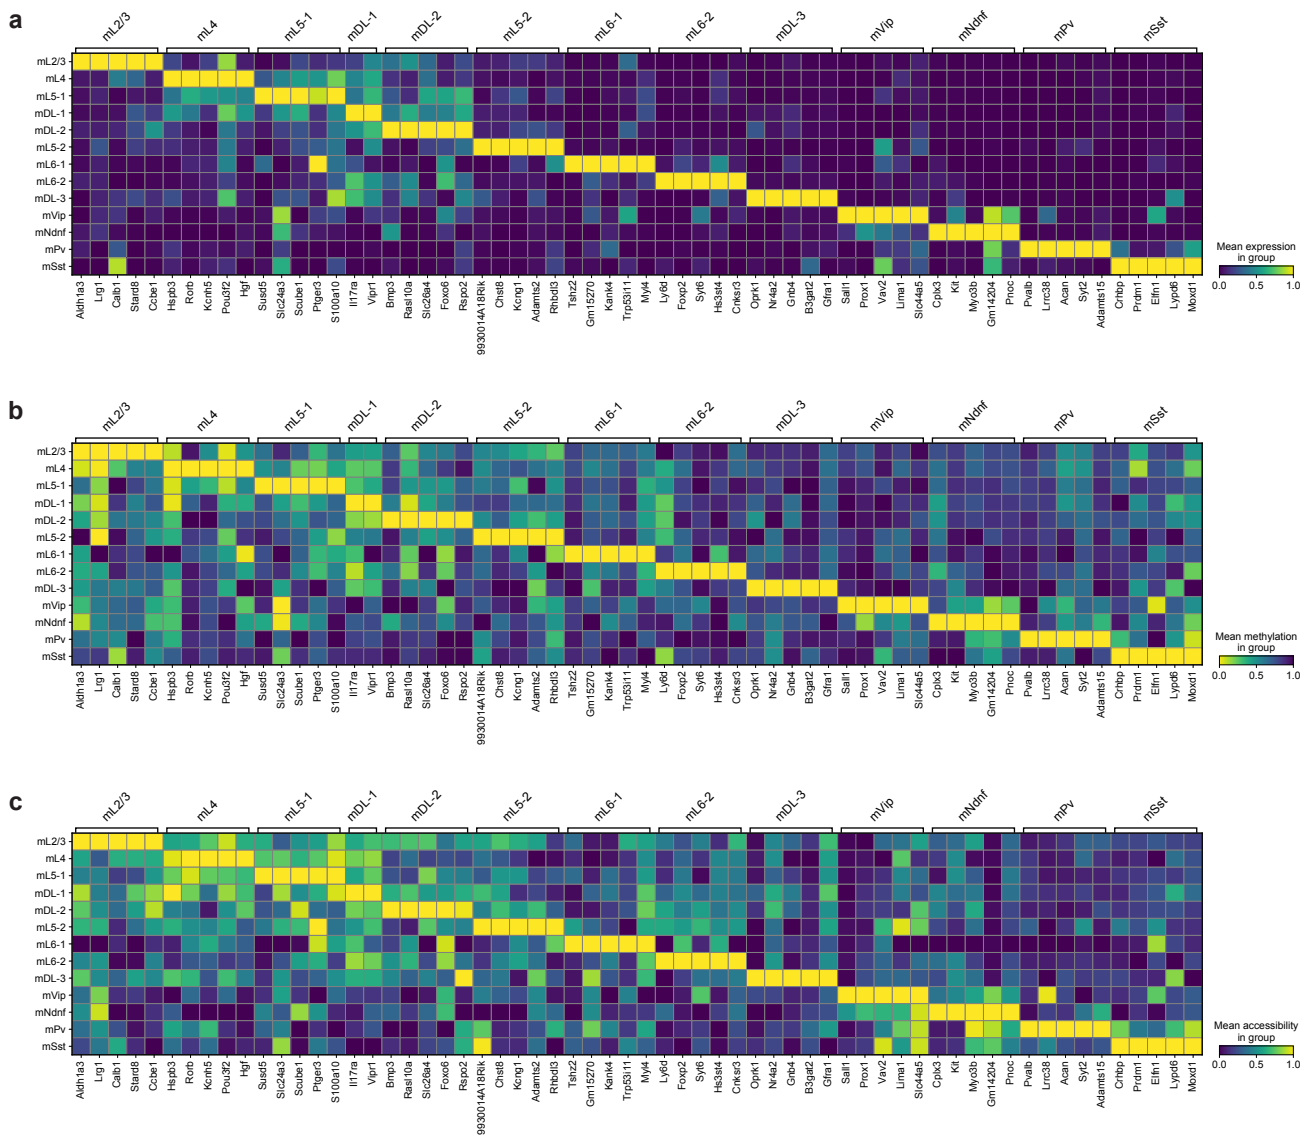

**Supplementary Fig. 6 Consensus cell type markers across three omics layers.**

**a**, Expression in scRNA-seq. **b**, Gene body DNA methylation in snmC-seq. **c**, Chromatin accessibility in scATAC-seq. Note that an inverted color bar is used for DNA methylation.

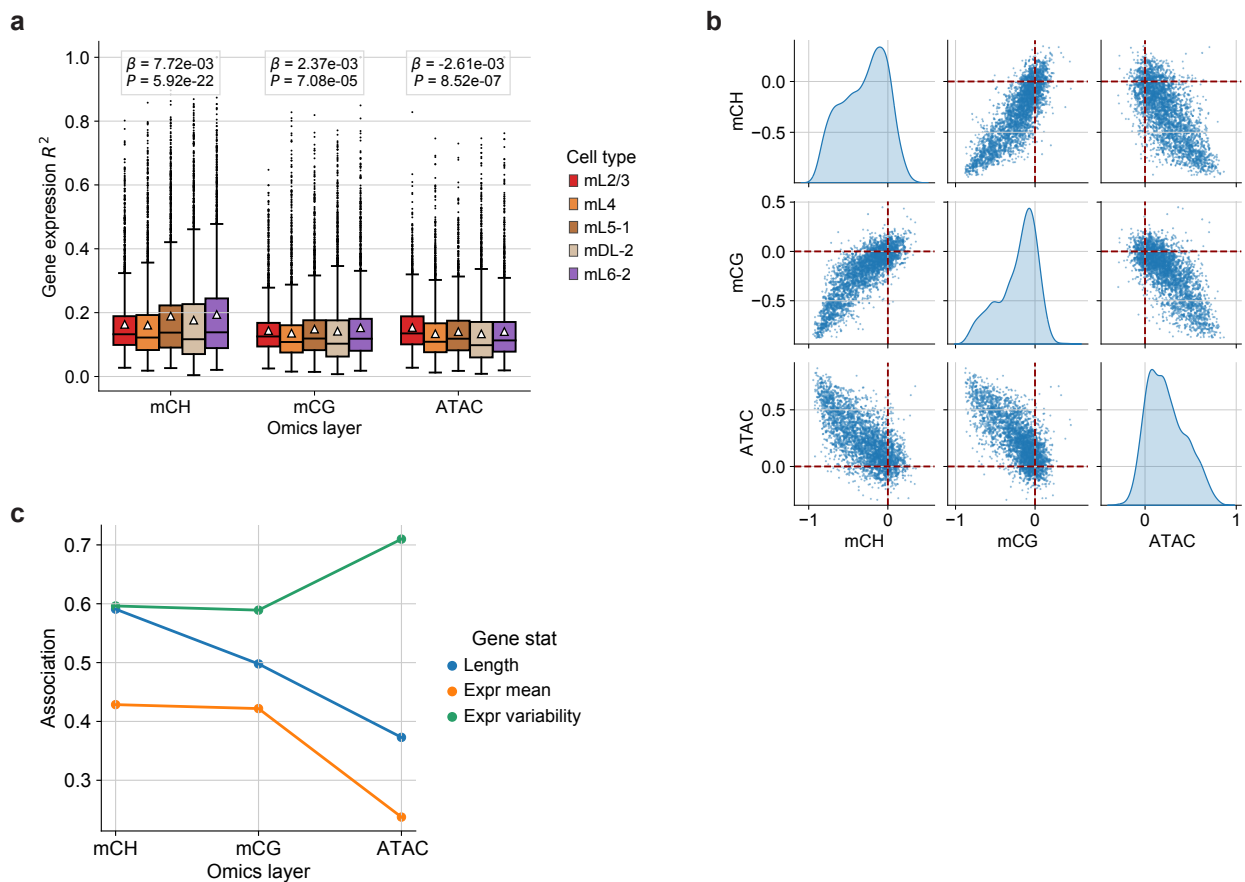

### Supplementary Fig. 7 Epigenetic contributions to gene expression.

**a**, Coefficient of determination ( $R^2$ ) for predicting gene expression based on each epigenetic layer in different cell types. The box plots indicate the medians (centerlines), means (triangles), 1st and 3rd quartiles (hinges), and minima and maxima (whiskers). Above each epigenetic layer, the linear regression slope ( $\beta$ ) and its  $P$  value are displayed, with the cell type as the regressor. **b**, Pearson's correlations between different epigenetic states and gene expression. **c**, Associations (defined as the absolute values of Pearson's correlations) between the correlations in **b** and different gene characteristics.

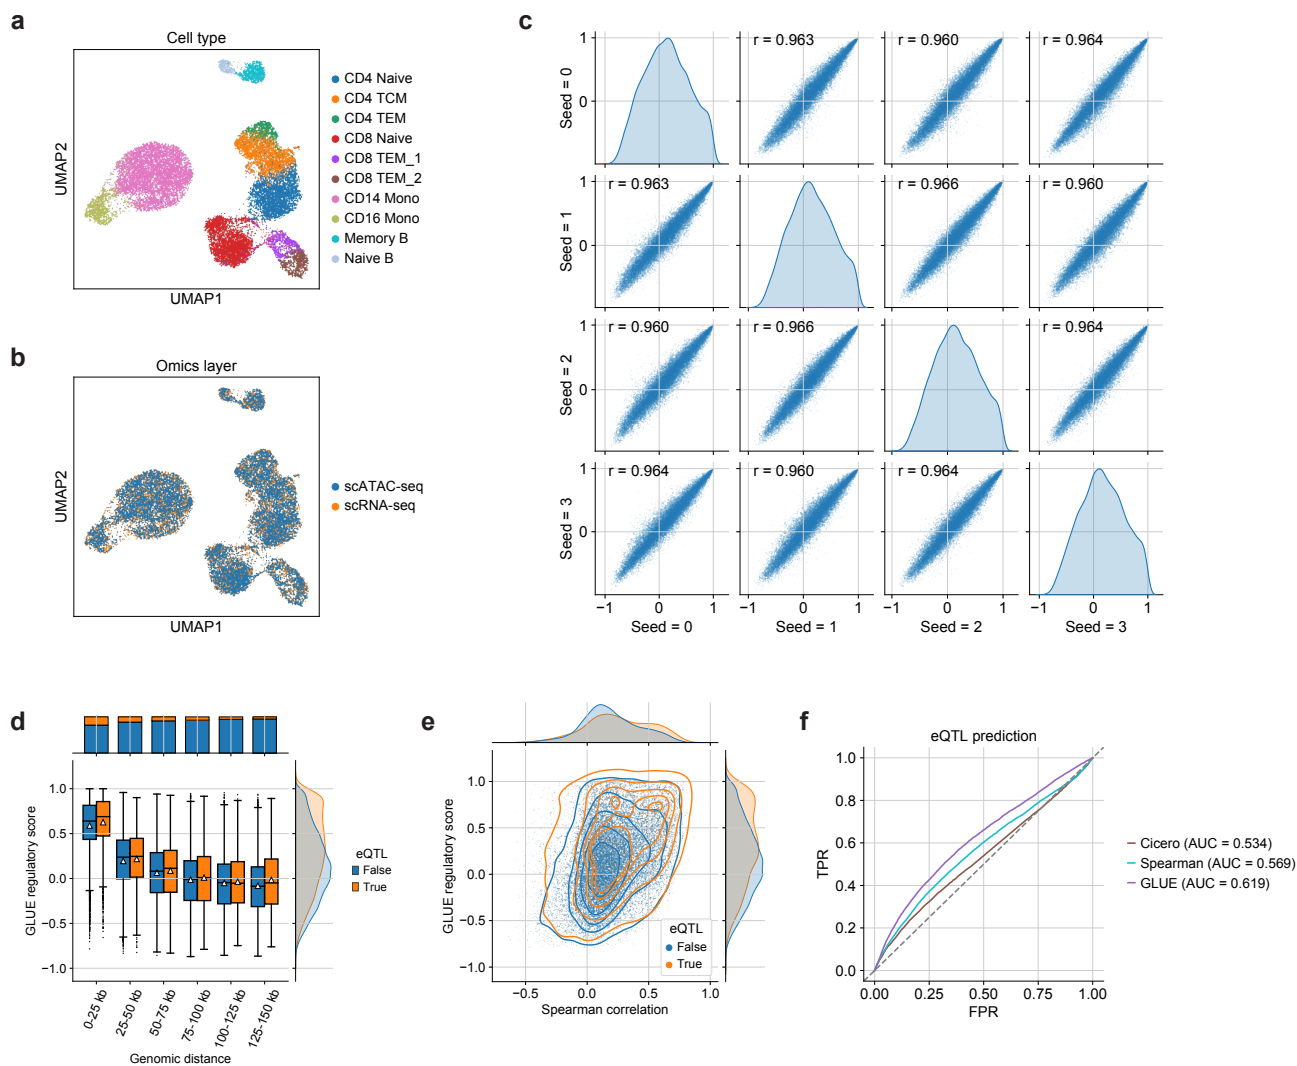

### Supplementary Fig. 8 Model-based regulatory inference using distance-based power-law interactions as guidance.

**a, b**, UMAP visualizations of the integrated cell embeddings colored by **a**, cell types, and **b**, omics layers. **c**, Pearson's correlation coefficients for the GLUE regulatory scores across different random seeds. **d**, GLUE regulatory scores for peak-gene pairs across different genomic ranges, grouped by whether they had eQTL support. The box plots indicate the medians (centerlines), means (triangles), 1st and 3rd quartiles (hinges), and minima and maxima (whiskers). **e**, Comparison between the GLUE regulatory scores and the empirical peak-gene correlations computed on paired cells. Peak-gene pairs are colored by whether they had eQTL support. **f**, ROC (receiver operating characteristic) curves for predicting eQTL interactions based on different peak-gene association scores.

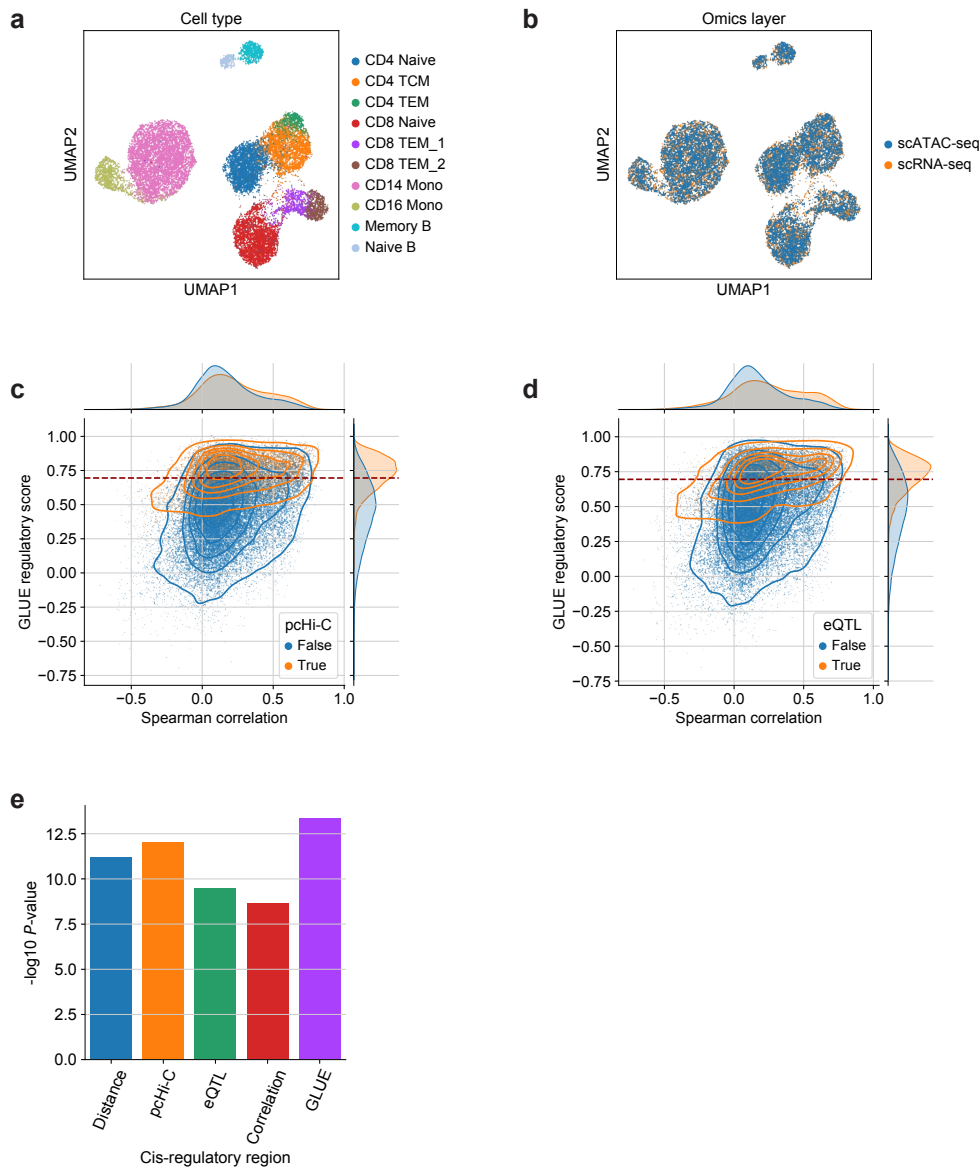

**Supplementary Fig. 9 Model-based regulatory inference using a combination of distance-based, eQTL and pHi-C interactions as guidance.**

**a, b**, UMAP visualizations of the integrated cell embeddings colored by **a**, cell types, and **b**, omics layers. **c, d**, Comparison between the GLUE regulatory scores and the empirical peak-gene correlations computed on paired cells. The peak-gene pairs are colored by whether they had **c**, pHi-C support or **d**, eQTL support. Red dashed lines indicate the 75th percentile of the GLUE regulatory scores, which was used as a cutoff. The GLUE-identified interactions mostly exhibited positive empirical correlations and covered the majority of pHi-C and eQTL support, while the selection of peak-gene pairs based solely on empirical correlation would lead to much lower external support. **e**, Consistency between the TF-target gene networks constructed with different peak-gene association methods and the manually curated connections in the TRRUST v2 database (Fisher's exact test).



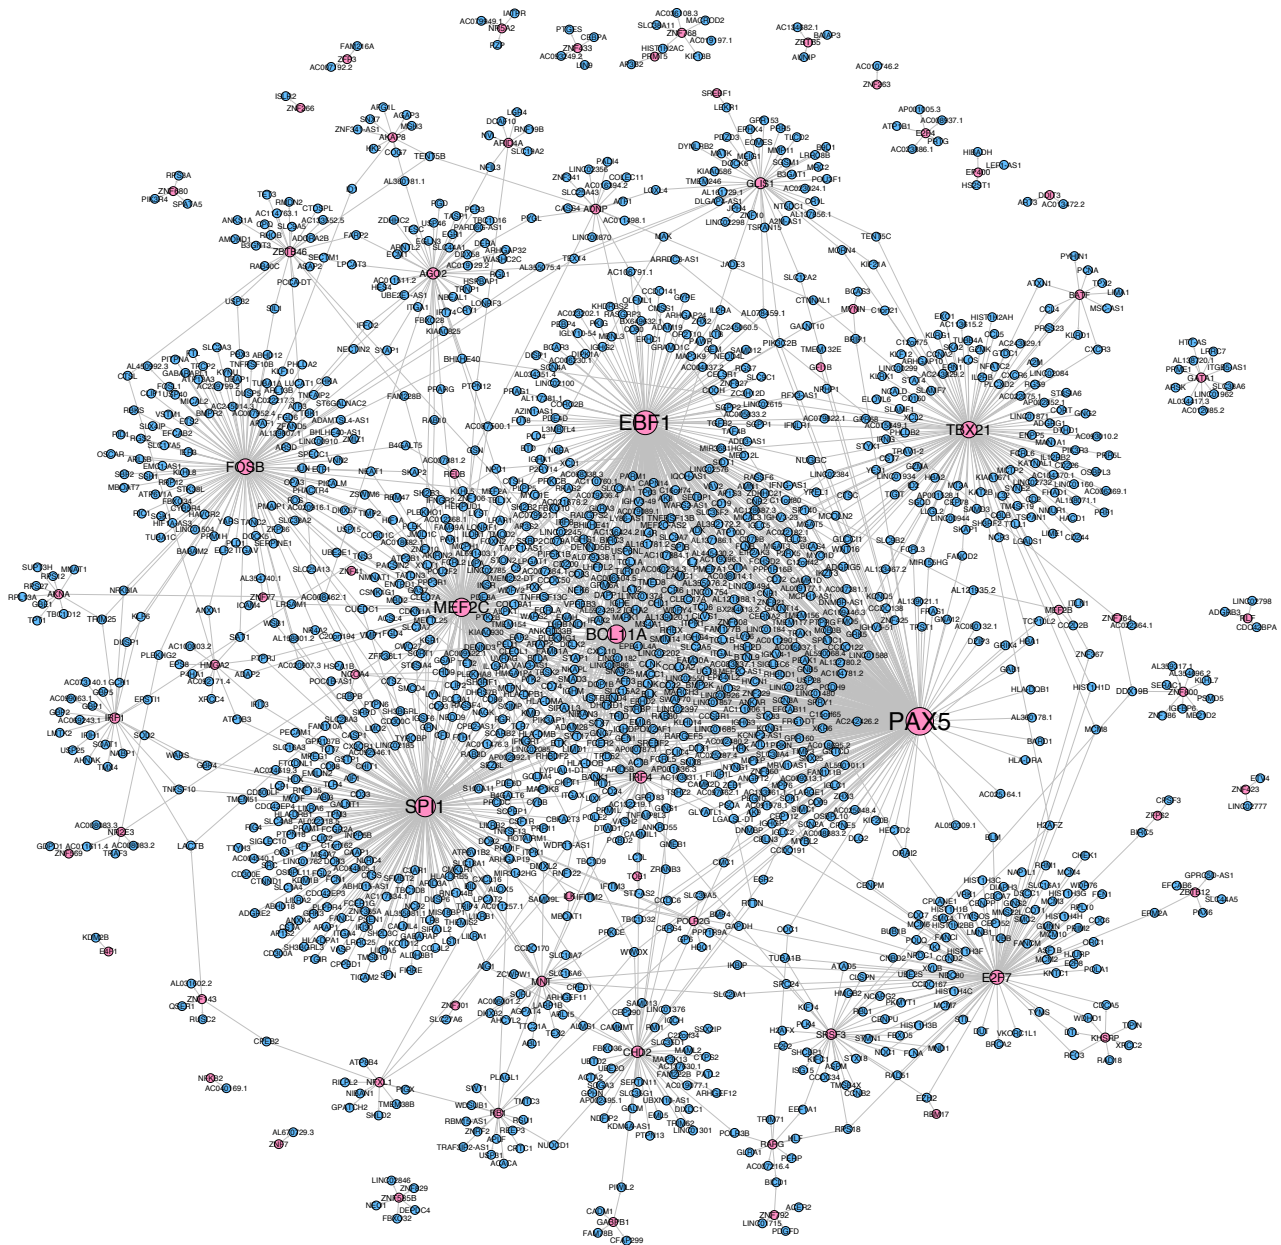

Supplementary Fig. 10 Inferred TF-target gene regulatory network in PBMC.

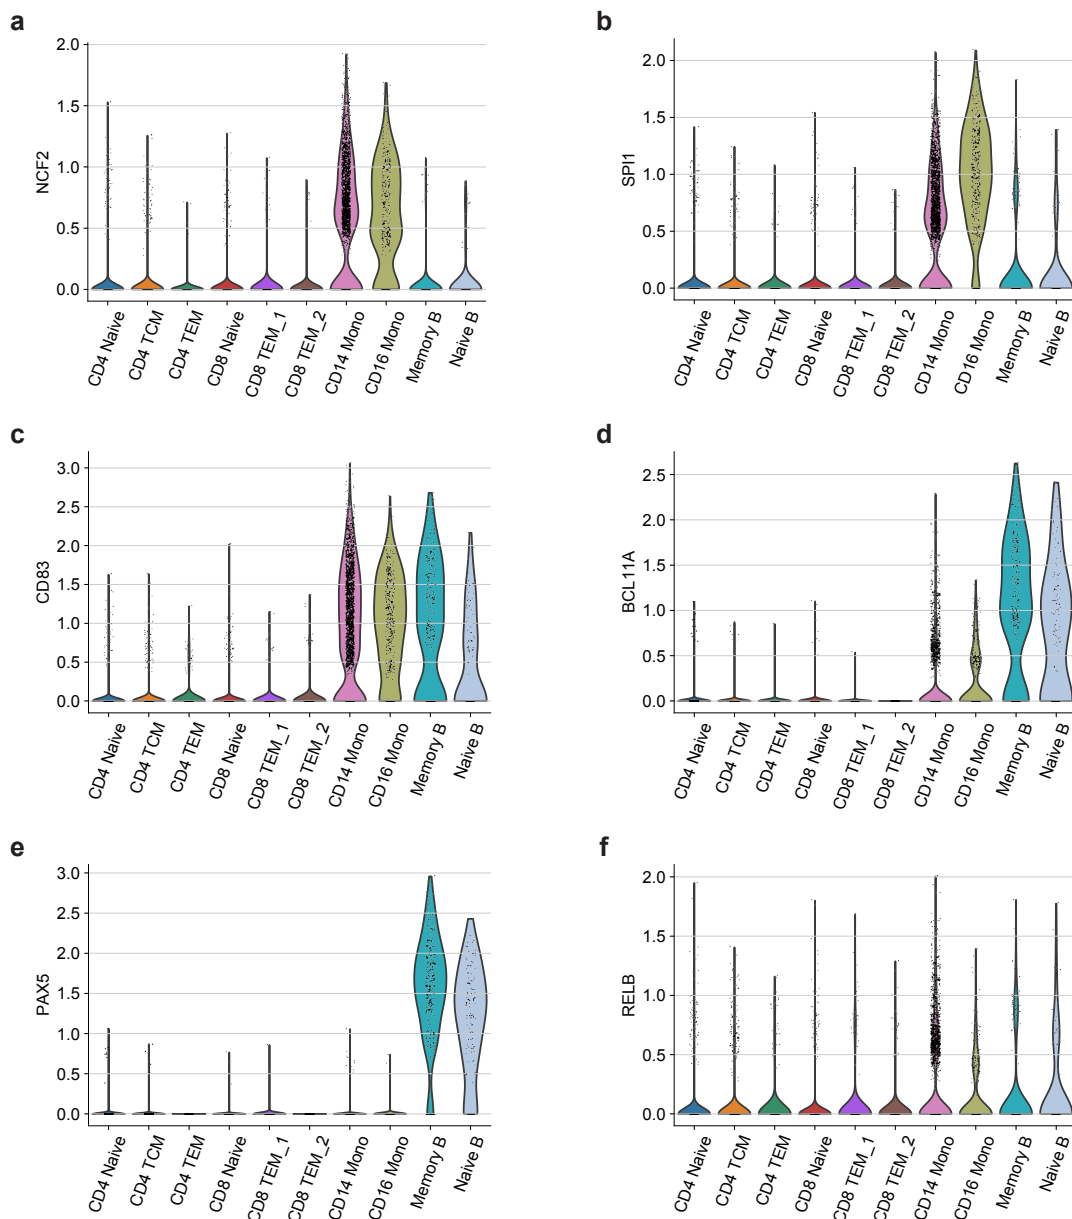

**Supplementary Fig. 11 TF-target gene expression levels in different cell types.**

**a, b**, Expression levels of **a**, *NCF2*, and its regulator **b**, *SPI1* in different cell types. **c-f**, Expression levels of **c**, *CD83*, and its inferred regulators **d**, *BCL11A*, **e**, *PAX5*, and **f**, *RELB* in different cell types.



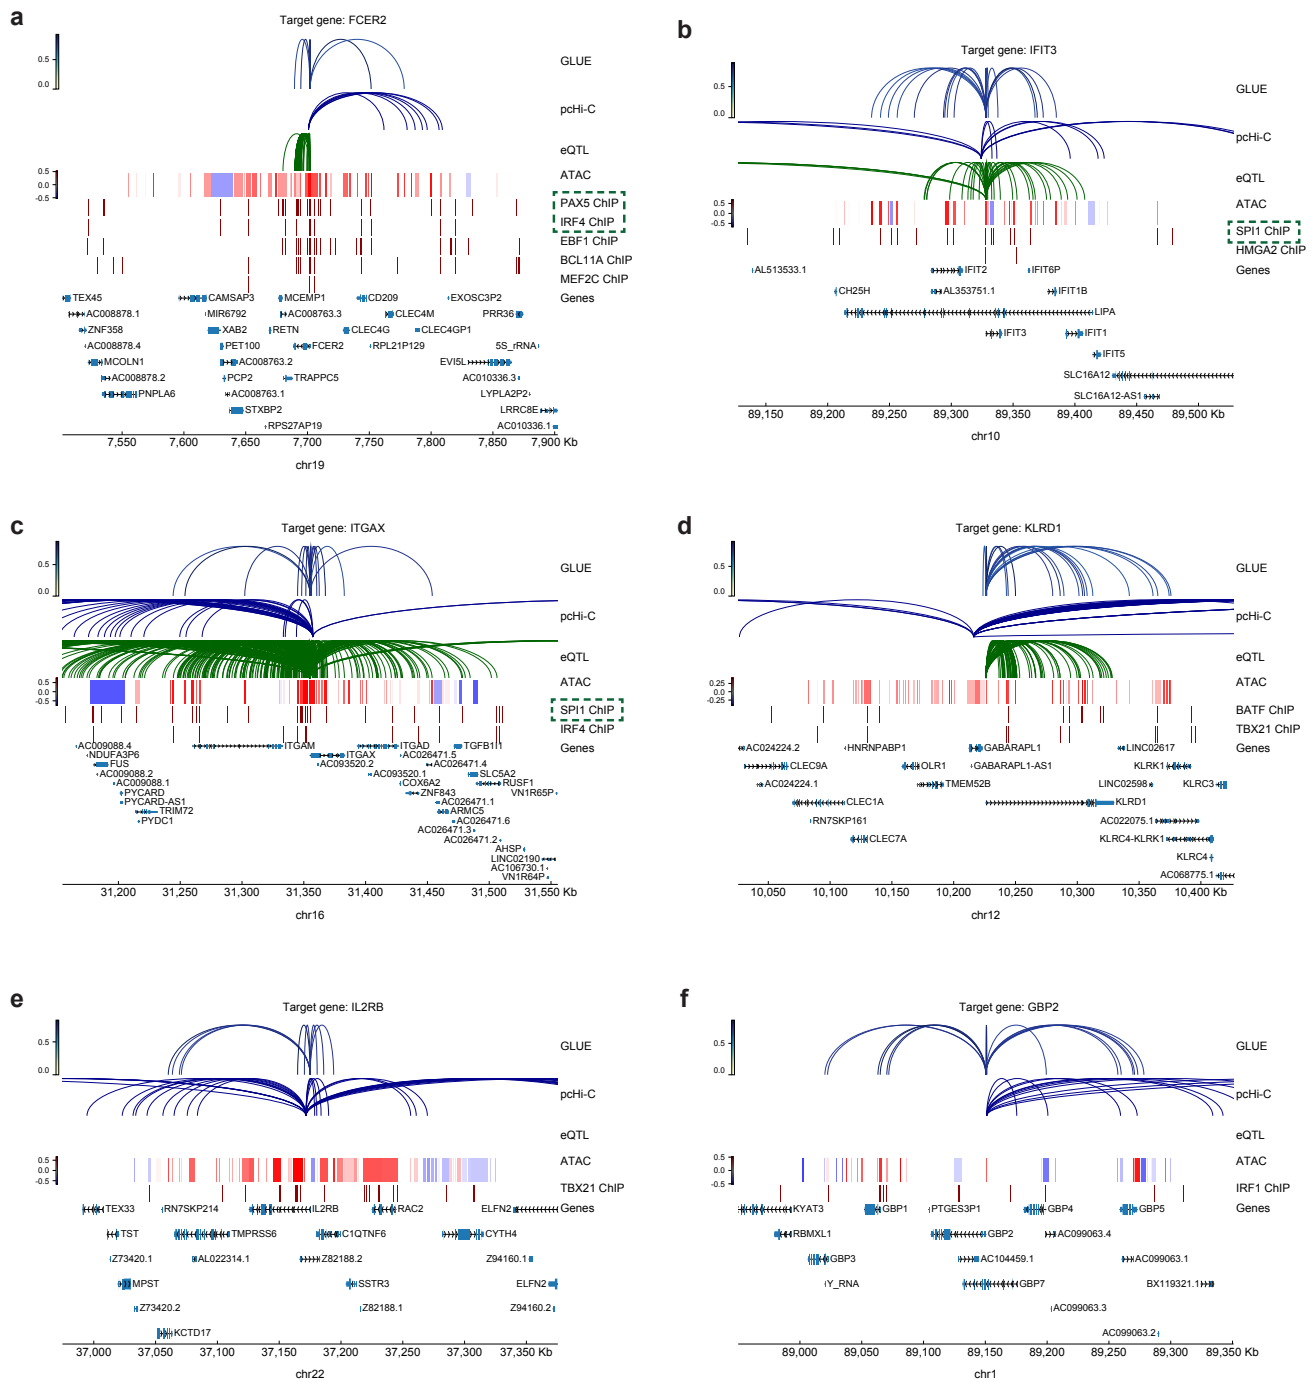

### Supplementary Fig. 12 Regulatory inference and evidence per gene.

GLUE-identified cis-regulatory interactions for **a**, *FCER2*, **b**, *IFIT3*, **c**, *ITGAX*, **d**, *KLRD1*, **e**, *IL2RB*, and **f**, *GBP2*, along with individual pieces of regulatory evidence. For each gene, the ChIP-seq tracks correspond to inferred TF regulators. Known regulators are highlighted with green boxes.

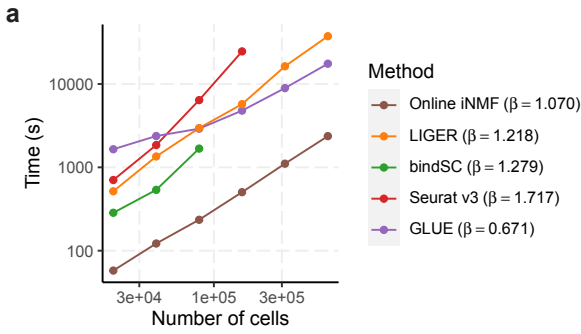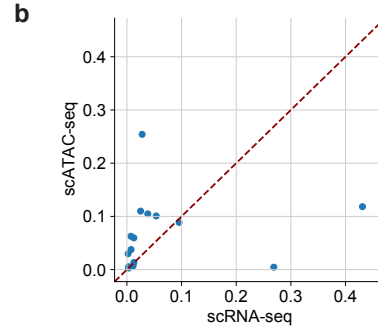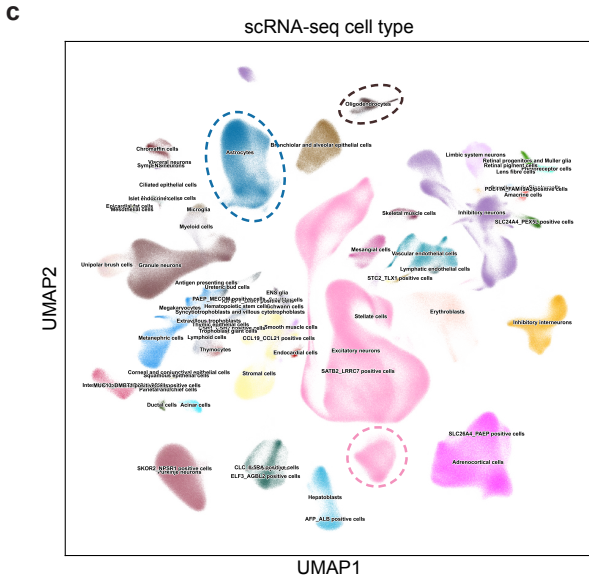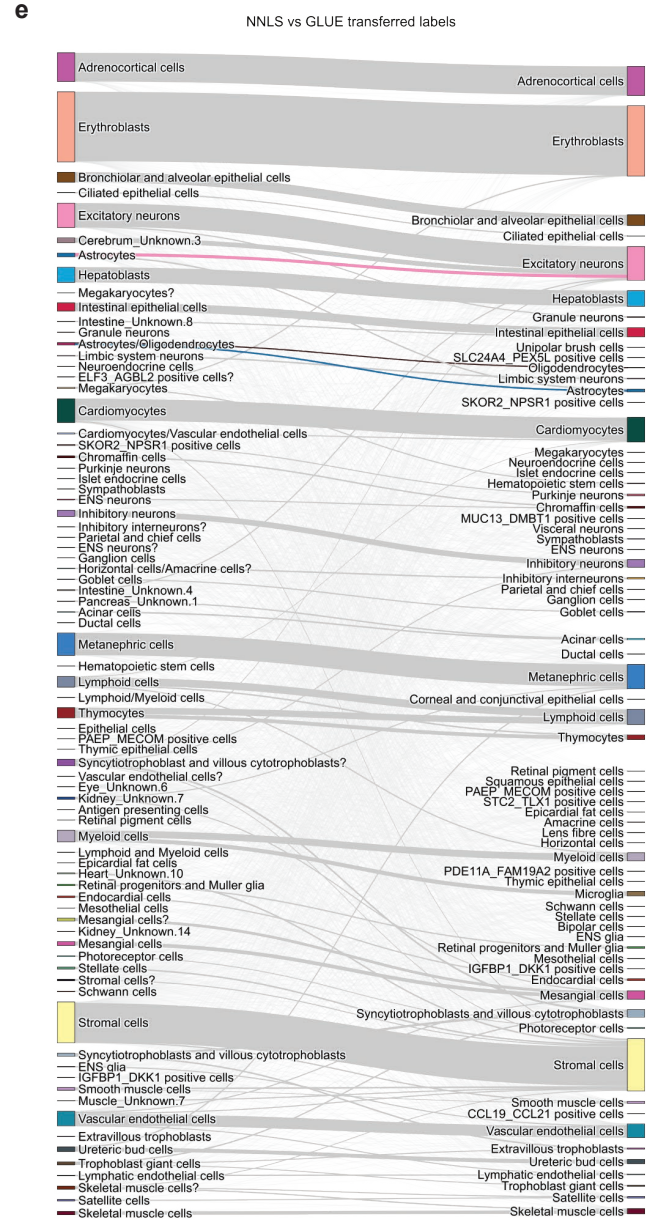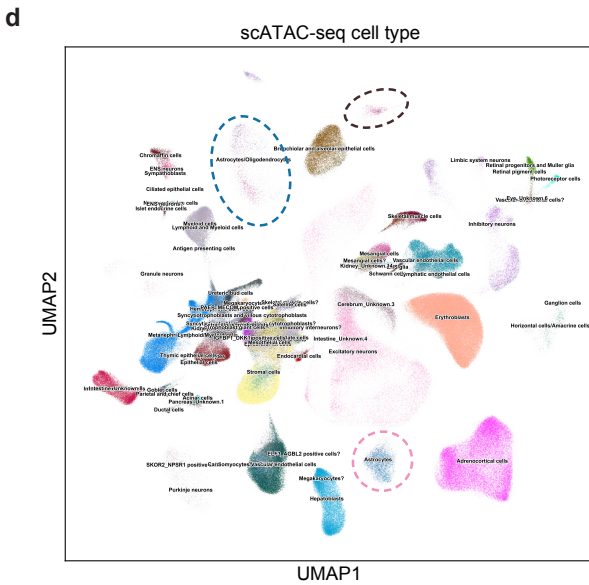

### Supplementary Fig. 13 Scalability benchmarking and integration of a multi-omics human cell atlas.

**a**, Time costs of different methods on subsampled atlases of varying sizes. The time costs and cell numbers are both plotted in log-scale, so the slope  $\beta$  represents the exponent in original scale, i.e.,  $\beta = 2$  represents quadratic scalability,  $\beta = 1$  represents linear scalability, and  $\beta < 1$  represents sublinear scalability. While online iNMF was the fastest method on the tested data sizes, GLUE has a lower  $\beta$ , and could surpass online iNMF as data size increases to dozens of millions. **b**, Organ compositions in scRNA-seq and scATAC-seq. **c**, UMAP visualizations of the integrated cell embeddings showing only the scRNA-seq cells, colored by the original cell types. **d**, UMAP visualizations of the integrated cell embeddings showing only the scATAC-seq cells, colored by the original cell types. **e**, Alluvial diagram comparing the NNLS (non-negative least squares)-based and GLUE-based cell type annotations. The original NNLS-based annotations are to the left, and the GLUE-based annotations are to the right. Cells originally labeled as “Astrocytes” but mapped to “Excitatory neurons” are highlighted with pink flows. Cells originally labeled as “Astrocytes/Oligodendrocytes” but mapped to “Astrocytes” are highlighted with blue flows. Cells originally labeled as “Astrocytes/Oligodendrocytes” but mapped to “Oligodendrocytes” are highlighted with brown flows.

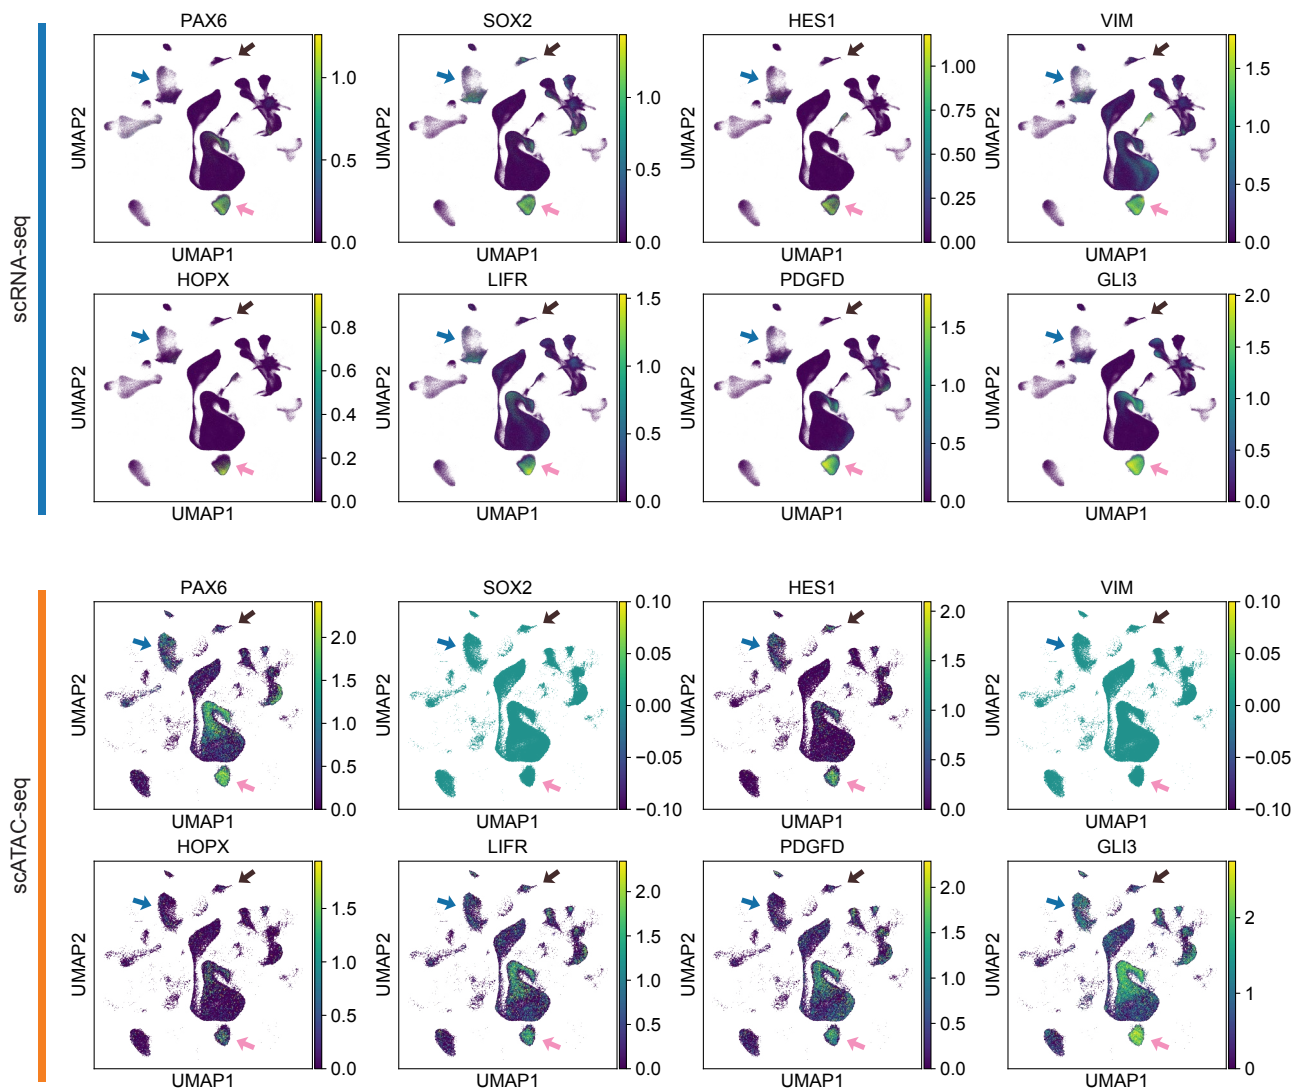

**Supplementary Fig. 14 Gene expression and chromatin accessibility patterns of neural progenitor markers in cerebrum cells.**

Putative neural progenitors are highlighted with pink arrows, astrocytes are highlighted with blue arrows, and oligodendrocytes are highlighted with brown arrows. *SOX2* and *VIM* were not detected in scATAC-seq, due to limitations in ATAC gene-level score calculation (no peaks overlap gene body and 2 kb upstream from TSS).

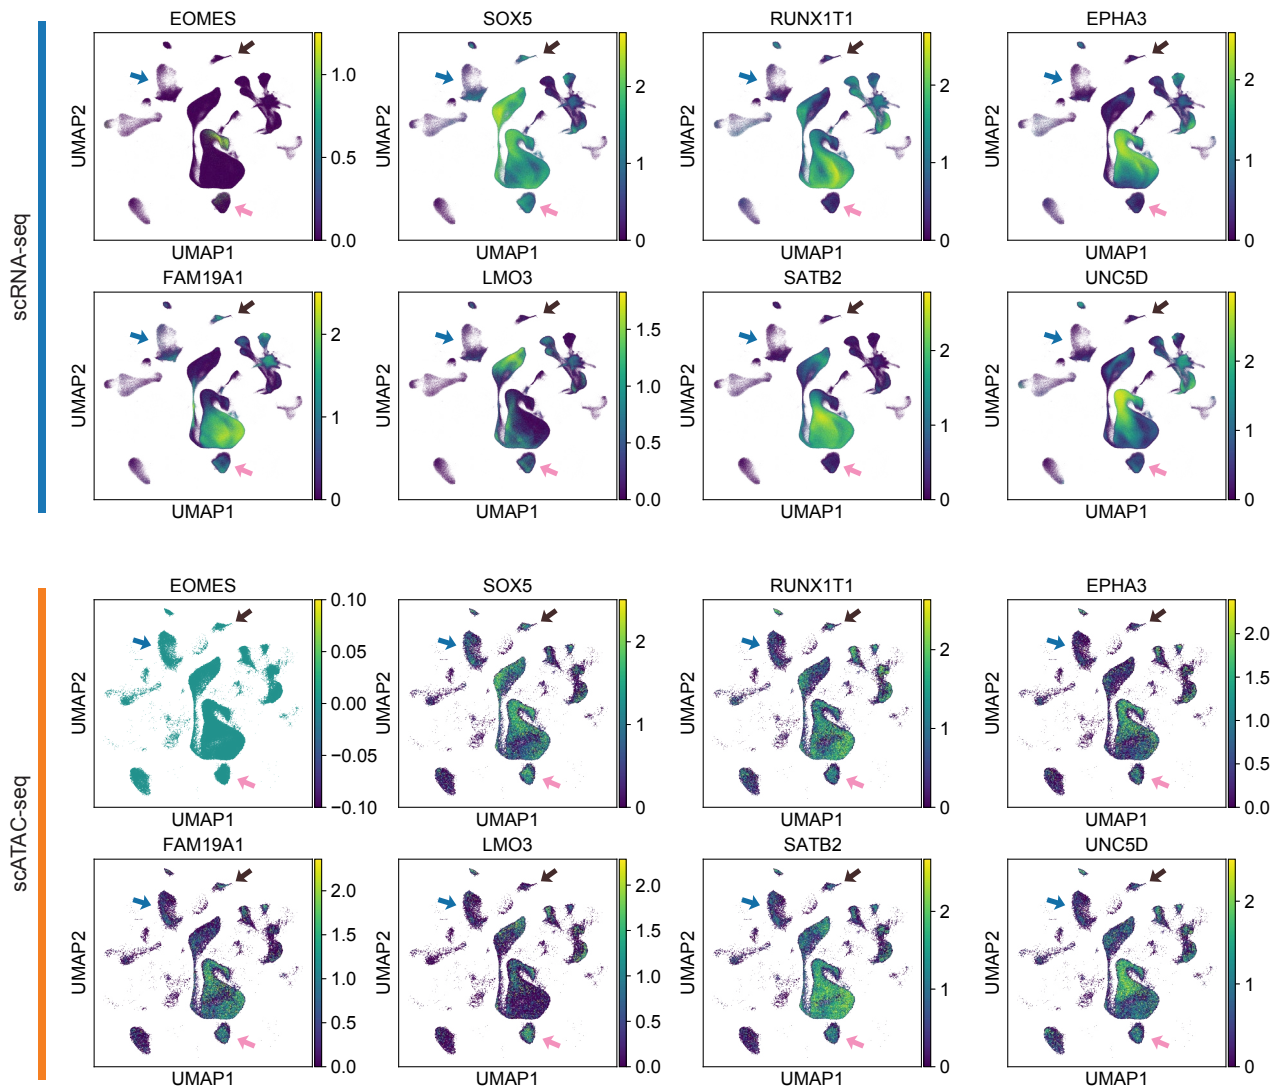

**Supplementary Fig. 15 Gene expression and chromatin accessibility patterns of excitatory neuron markers in cerebrum cells.**

Putative neural progenitors are highlighted with pink arrows, astrocytes are highlighted with blue arrows, and oligodendrocytes are highlighted with brown arrows. *EOMES* was not detected in scATAC-seq, due to limitations in ATAC gene-level score calculation (no peaks overlap gene body and 2 kb upstream from TSS).



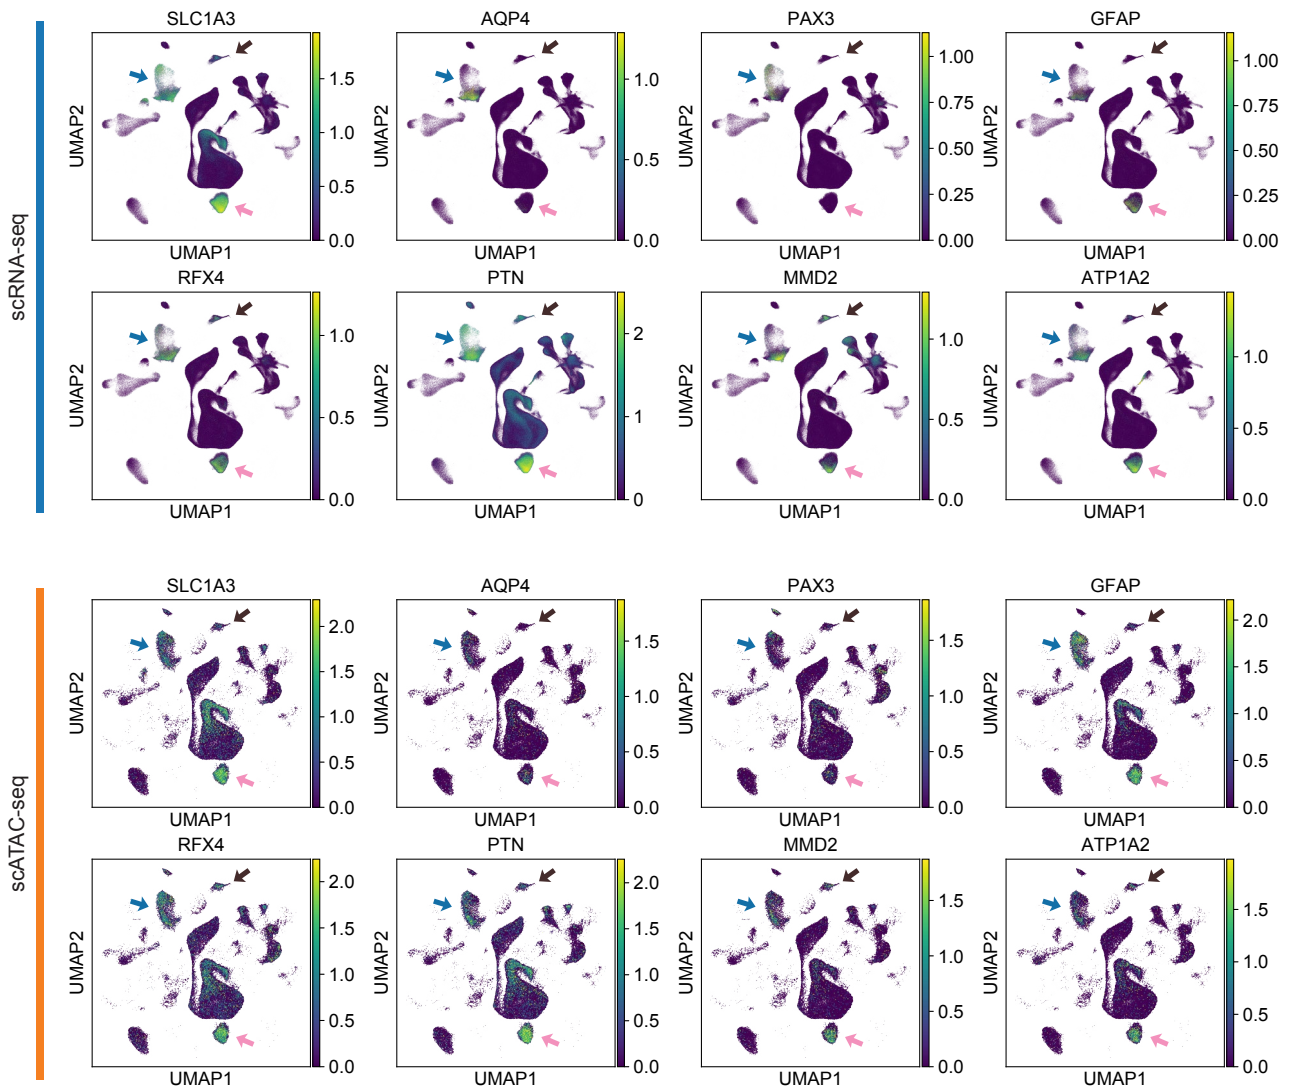

**Supplementary Fig. 16 Gene expression and chromatin accessibility patterns of astrocyte markers in cerebrum cells.**

Putative neural progenitors are highlighted with pink arrows, astrocytes are highlighted with blue arrows, and oligodendrocytes are highlighted with brown arrows.

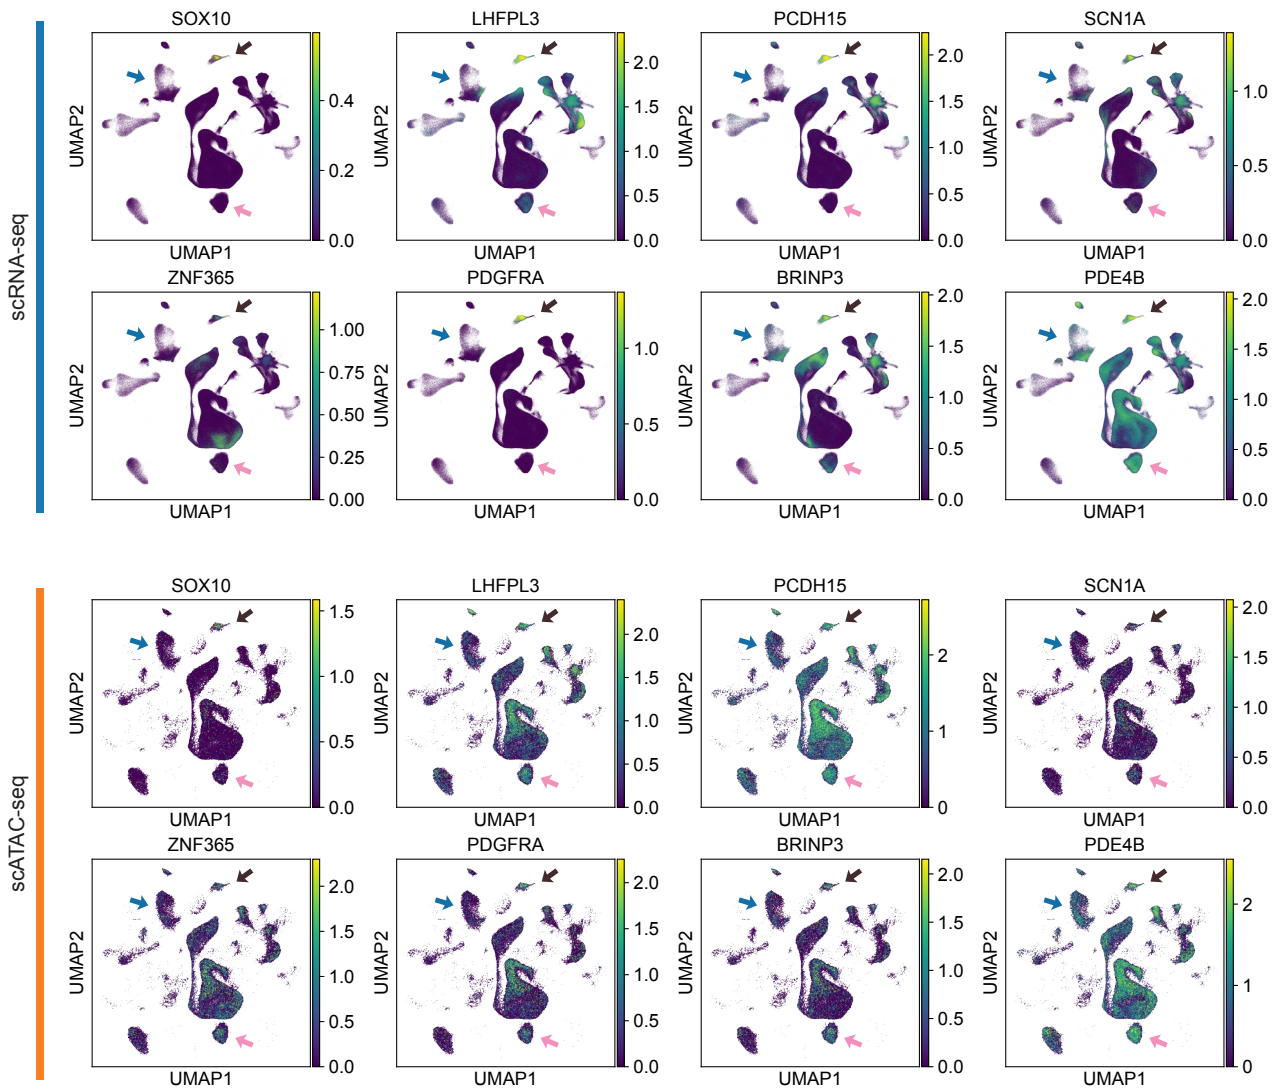

**Supplementary Fig. 17 Gene expression and chromatin accessibility patterns of oligodendrocyte markers in cerebrum cells.**

Putative neural progenitors are highlighted with pink arrows, astrocytes are highlighted with blue arrows, and oligodendrocytes are highlighted with brown arrows.

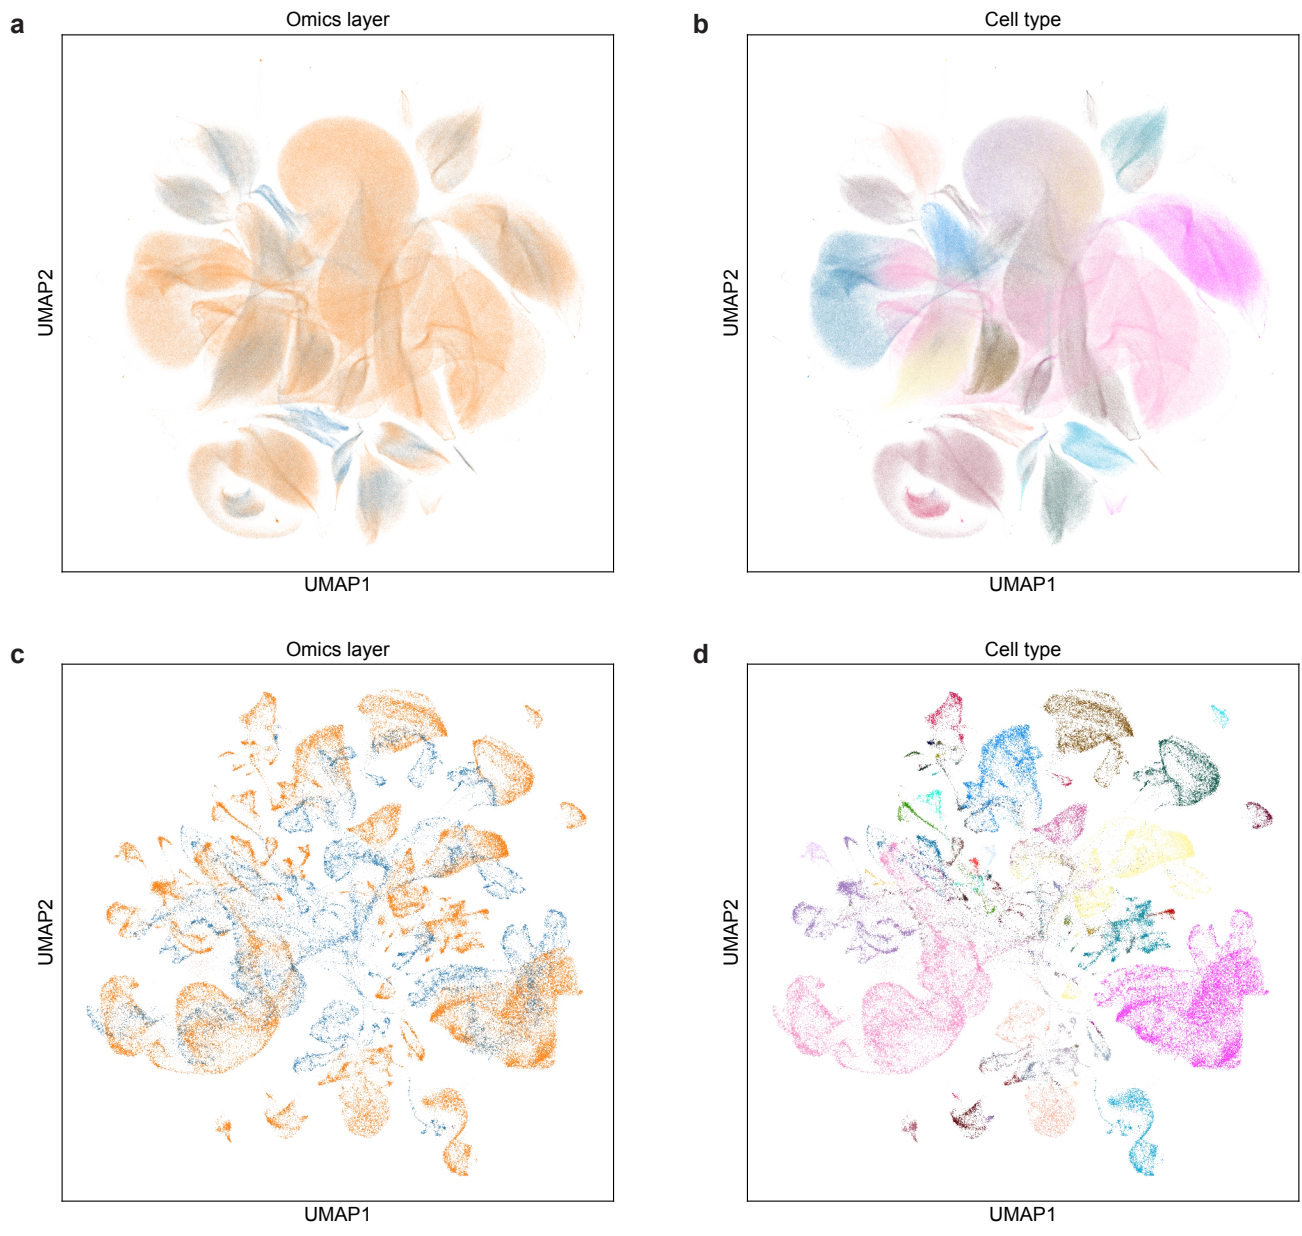

- |                                                                                                                                                                                                                                                                                                                                                                                                                                                                                                                                                                                                                                                                                                                                                                               |                                                                                                                                                                                                                                                                                                                                                                                                                                                                                                                                                                                                                                                                                    |                                                                                                                                                                                                                                                                                                                                                                                                                                                                                                                                                                                                                                                                                                                                                            |                                                                                                                                                                                                                                                                                                                                                                                                                                                                                                                                                                                                                                                                                                                                                                   |                                                                                                                                                                                                                                                                                                                                                                                                                                                                                                                                                                                                                                                                                                                                                                             |
|-------------------------------------------------------------------------------------------------------------------------------------------------------------------------------------------------------------------------------------------------------------------------------------------------------------------------------------------------------------------------------------------------------------------------------------------------------------------------------------------------------------------------------------------------------------------------------------------------------------------------------------------------------------------------------------------------------------------------------------------------------------------------------|------------------------------------------------------------------------------------------------------------------------------------------------------------------------------------------------------------------------------------------------------------------------------------------------------------------------------------------------------------------------------------------------------------------------------------------------------------------------------------------------------------------------------------------------------------------------------------------------------------------------------------------------------------------------------------|------------------------------------------------------------------------------------------------------------------------------------------------------------------------------------------------------------------------------------------------------------------------------------------------------------------------------------------------------------------------------------------------------------------------------------------------------------------------------------------------------------------------------------------------------------------------------------------------------------------------------------------------------------------------------------------------------------------------------------------------------------|-------------------------------------------------------------------------------------------------------------------------------------------------------------------------------------------------------------------------------------------------------------------------------------------------------------------------------------------------------------------------------------------------------------------------------------------------------------------------------------------------------------------------------------------------------------------------------------------------------------------------------------------------------------------------------------------------------------------------------------------------------------------|-----------------------------------------------------------------------------------------------------------------------------------------------------------------------------------------------------------------------------------------------------------------------------------------------------------------------------------------------------------------------------------------------------------------------------------------------------------------------------------------------------------------------------------------------------------------------------------------------------------------------------------------------------------------------------------------------------------------------------------------------------------------------------|
| <p><b>Omics layer</b></p> <ul style="list-style-type: none"> <li>● scATAC-seq</li> <li>● scRNA-seq</li> </ul> <p><b>Cell type</b></p> <ul style="list-style-type: none"> <li>● AFP_ALB positive cells</li> <li>● Acinar cells</li> <li>● Adrenocortical cells</li> <li>● Amacrine cells</li> <li>● Antigen presenting cells</li> <li>● Astrocytes</li> <li>● Astrocytes/Oligodendrocytes</li> <li>● Bipolar cells</li> <li>● Bronchiolar and alveolar epithelial cells</li> <li>● CCL19_CCL21 positive cells</li> <li>● CLC_IL5RA positive cells</li> <li>● CSH1_CSH2 positive cells</li> <li>● Cardiomyocytes</li> <li>● Cardiomyocytes/Vascular endothelial cells</li> <li>● Cerebrum_Unknown.3</li> <li>● Chromaffin cells</li> <li>● Ciliated epithelial cells</li> </ul> | <ul style="list-style-type: none"> <li>● Corneal and conjunctival epithelial cells</li> <li>● Ductal cells</li> <li>● ELF3_AGBL2 positive cells</li> <li>● ELF3_AGBL2 positive cells?</li> <li>● ENS glia</li> <li>● ENS neurons</li> <li>● ENS neurons?</li> <li>● Endocardial cells</li> <li>● Epicardial fat cells</li> <li>● Epithelial cells</li> <li>● Erythroblasts</li> <li>● Excitatory neurons</li> <li>● Extravillous trophoblasts</li> <li>● Eye_Unknown.6</li> <li>● Ganglion cells</li> <li>● Goblet cells</li> <li>● Granule neurons</li> <li>● Heart_Unknown.10</li> <li>● Hematopoietic stem cells</li> <li>● Hepatoblasts</li> <li>● Horizontal cells</li> </ul> | <ul style="list-style-type: none"> <li>● Horizontal cells/Amacrine cells?</li> <li>● IGFBP1_DKK1 positive cells</li> <li>● Inhibitory interneurons</li> <li>● Inhibitory interneurons?</li> <li>● Inhibitory neurons</li> <li>● Intestinal epithelial cells</li> <li>● Intestine_Unknown.4</li> <li>● Intestine_Unknown.8</li> <li>● Islet endocrine cells</li> <li>● Kidney_Unknown.7</li> <li>● Kidney_Unknown.14</li> <li>● Lens fibre cells</li> <li>● Limbic system neurons</li> <li>● Lymphatic endothelial cells</li> <li>● Lymphoid and Myeloid cells</li> <li>● Lymphoid cells</li> <li>● Lymphoid/Myeloid cells</li> <li>● MUC13_DMBT1 positive cells</li> <li>● Megakaryocytes</li> <li>● Megakaryocytes?</li> <li>● Mesangial cells</li> </ul> | <ul style="list-style-type: none"> <li>● Mesangial cells?</li> <li>● Mesothelial cells</li> <li>● Metanephric cells</li> <li>● Microglia</li> <li>● Muscle_Unknown.7</li> <li>● Myeloid cells</li> <li>● Neuroendocrine cells</li> <li>● Oligodendrocytes</li> <li>● PAEP_MECCOM positive cells</li> <li>● PDE1C_ACSM3 positive cells</li> <li>● PDE11A_FAM19A2 positive cells</li> <li>● Pancreas_Unknown.1</li> <li>● Parietal and chief cells</li> <li>● Photoreceptor cells</li> <li>● Purkinje neurons</li> <li>● Retinal pigment cells</li> <li>● Retinal progenitors and Muller glia</li> <li>● SATB2_LRRC7 positive cells</li> <li>● SKOR2_NPSR1 positive cells</li> <li>● SLC24A4_PEX5L positive cells</li> <li>● SLC26A4_PAEP positive cells</li> </ul> | <ul style="list-style-type: none"> <li>● STC2_TLX1 positive cells</li> <li>● Satellite cells</li> <li>● Schwann cells</li> <li>● Skeletal muscle cells</li> <li>● Skeletal muscle cells?</li> <li>● Smooth muscle cells</li> <li>● Squamous epithelial cells</li> <li>● Stellate cells</li> <li>● Stromal cells</li> <li>● Stromal cells?</li> <li>● Sympathoblasts</li> <li>● Syncytiotrophoblast and villous cytotrophoblasts?</li> <li>● Syncytiotrophoblasts and villous cytotrophoblasts</li> <li>● Thymic epithelial cells</li> <li>● Thymocytes</li> <li>● Trophoblast giant cells</li> <li>● Ureteric bud cells</li> <li>● Unipolar brush cells</li> <li>● Vascular endothelial cells</li> <li>● Vascular endothelial cells?</li> <li>● Visceral neurons</li> </ul> |
|-------------------------------------------------------------------------------------------------------------------------------------------------------------------------------------------------------------------------------------------------------------------------------------------------------------------------------------------------------------------------------------------------------------------------------------------------------------------------------------------------------------------------------------------------------------------------------------------------------------------------------------------------------------------------------------------------------------------------------------------------------------------------------|------------------------------------------------------------------------------------------------------------------------------------------------------------------------------------------------------------------------------------------------------------------------------------------------------------------------------------------------------------------------------------------------------------------------------------------------------------------------------------------------------------------------------------------------------------------------------------------------------------------------------------------------------------------------------------|------------------------------------------------------------------------------------------------------------------------------------------------------------------------------------------------------------------------------------------------------------------------------------------------------------------------------------------------------------------------------------------------------------------------------------------------------------------------------------------------------------------------------------------------------------------------------------------------------------------------------------------------------------------------------------------------------------------------------------------------------------|-------------------------------------------------------------------------------------------------------------------------------------------------------------------------------------------------------------------------------------------------------------------------------------------------------------------------------------------------------------------------------------------------------------------------------------------------------------------------------------------------------------------------------------------------------------------------------------------------------------------------------------------------------------------------------------------------------------------------------------------------------------------|-----------------------------------------------------------------------------------------------------------------------------------------------------------------------------------------------------------------------------------------------------------------------------------------------------------------------------------------------------------------------------------------------------------------------------------------------------------------------------------------------------------------------------------------------------------------------------------------------------------------------------------------------------------------------------------------------------------------------------------------------------------------------------|

**Supplementary Fig. 18 UMAP visualization of the multi-omics human cell atlas integrated by other methods.**  
**a, b,** Online iNMF-integrated cell embeddings colored by **a,** omics layers, and **b,** cell types. **c, d,** Seurat v3-integrated cell embeddings of aggregated metacells colored by **c,** omics layers, and **d,** cell types.



**Supplementary Table 1 Public datasets used in the study.**

**Supplementary Table 2 Detailed benchmark data.**

**Supplementary Table 3 Regulatory interactions in the GLUE-derived TF-target gene network.**
